# Supplementary material for: Preparation of functional Zein/ Spirulina protein isolate nanocomposite particles for improved encapsulation of glabridin
Source: Royal Society of Chemistry journal article supplement (doi:10.1039/d5sm00953g), 2025-12-11
Supplement: d5sm00953g1.pdf [file d5sm00953g1.pdf]

## Supplementary Information

### Preparation of functional Zein/*Spirulina* protein isolate nanocomposite particles for improved encapsulation of glabridin

Jie Mei<sup>a</sup>, Chen Li<sup>b</sup>, Beizhe Chang<sup>a</sup>, Xiaomin Li<sup>a</sup>, Yunxing Li<sup>a\*</sup>, Bingtian Zhao<sup>a</sup>, Cheng Yang<sup>a\*</sup>, To Ngai<sup>c\*</sup>

<sup>a</sup> Key Laboratory of Synthetic and Biological Colloids, Ministry of Education, School of Chemical and Material Engineering, Jiangnan University, Wuxi 214122, China. E-mail: yunxingli@jiangnan.edu.cn; cyang@jiangnan.edu.cn

<sup>b</sup> School of Chemistry, Biology and Environment, Yuxi Normal University, Yuxi 653100, China.

<sup>c</sup> Department of Chemistry, The Chinese University of Hong Kong, Shatin, N. T., Hong Kong, China. E-mail: tongai@cuhk.edu.hk

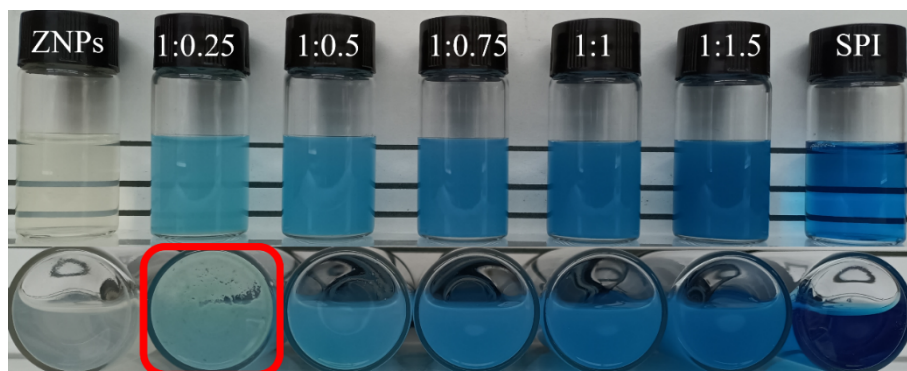

Figure S1. Visual appearance of the aqueous dispersions of zein nanoparticles (ZNPs) and Zein/SPI nanocomposite particles with different mass ratios, as well as the SPI solution. Visible sediments were observed in the aqueous dispersion of Zein/SPI nanocomposite particles with a mass ratio of 1:0.25.

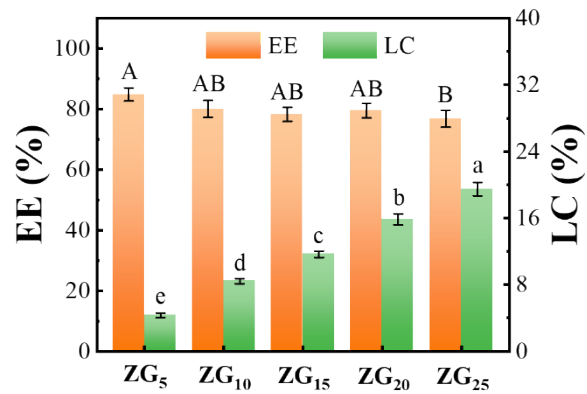

Figure S2. EE and LC of GLA-loaded ZNPs (ZG) prepared with different concentrations of GLA. Different letters represent significant differences ( $p < 0.05$ ).

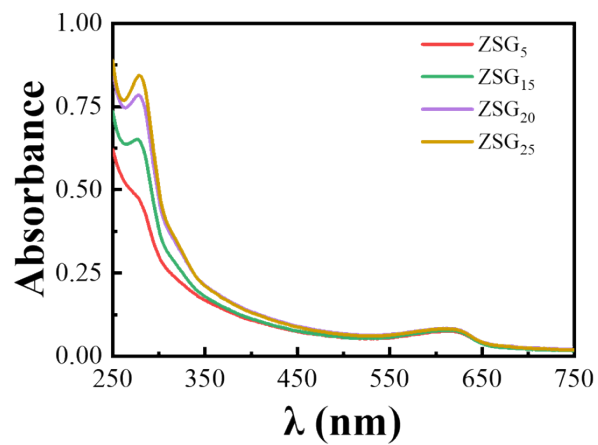

Figure S3. UV-vis spectrum of ZSG<sub>5</sub>, ZSG<sub>15</sub>, ZSG<sub>20</sub> and ZSG<sub>25</sub>

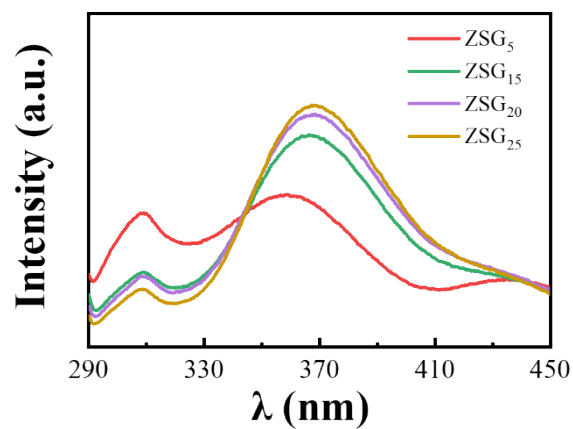

Figure S4. Fluorescence spectrum of ZSG<sub>5</sub>, ZSG<sub>15</sub>, ZSG<sub>20</sub> and ZSG<sub>25</sub>.

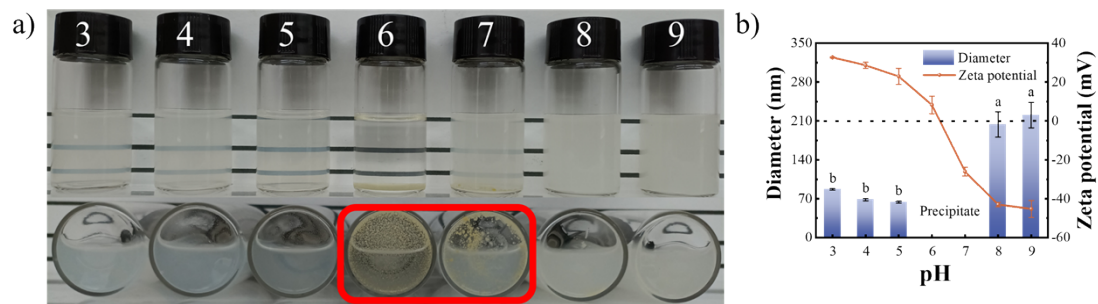

Figure S5. Visual appearance of aqueous dispersions of ZG<sub>10</sub> under different pH (a), effect of pH on the average diameter and zeta potential of ZG<sub>10</sub> (b). Different letters represent significant differences ( $p < 0.05$ ). Visible sediments were observed in the aqueous dispersions of ZG<sub>10</sub> at pH of 6 and 7.

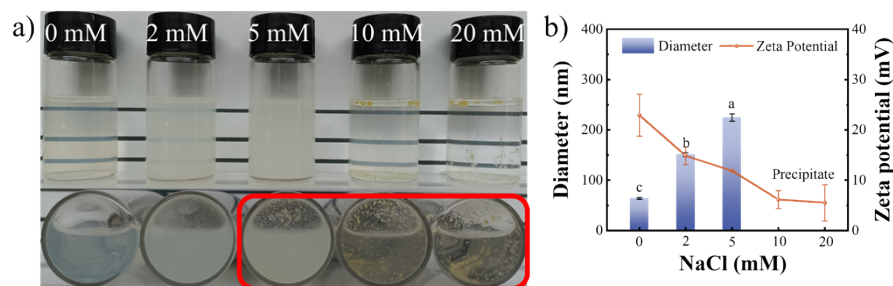

Figure S6. Visual appearance of aqueous dispersions of ZG<sub>10</sub> under different concentration of NaCl (a), effect of NaCl on the average diameter and zeta potential of ZG<sub>10</sub> (b). Different letters represent significant differences ( $p < 0.05$ ). Visible sediments were observed in the aqueous dispersions of ZG<sub>10</sub> at salt concentrations of 5, 10, and 20 mM.

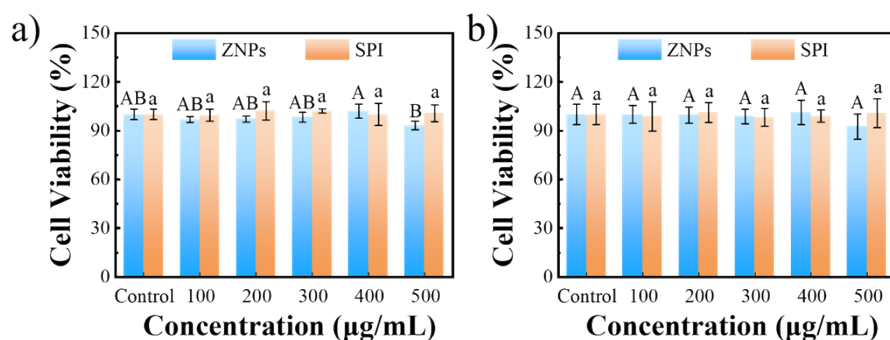

Figure S7. Cell viability of HaCaT cells (a), and NCM-460 cells (b) treated with different concentrations of ZNPs and SPI, respectively. Different letters represent significant differences ( $p < 0.05$ ).

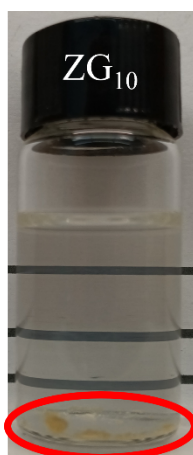

Figure S8. Visual appearance of aqueous dispersion of ZG<sub>10</sub> after releasing for 12 h
